# Supplementary material for: Synaptic Facilitation: A Key Biological Mechanism for Resource Allocation in Computational Models of Working Memory
Source: Springer Nature journal article supplement (doi:10.1007/s12559-023-10234-4), 2023-12-28
Supplement: MOESM1 [file 26573524]

## Supplementary Material

Table 1: Parameters of the integrate-and-fire simulations

| PARAMETER                                                       | VALUE                               |
|-----------------------------------------------------------------|-------------------------------------|
| <b>Network parameters</b>                                       |                                     |
| $N$ : number of neurons in the network                          | 1000                                |
| $N_E$ : number of excitatory neurons                            | $0.8 \cdot N$                       |
| $N_I$ : number of inhibitory neurons                            | $0.2 \cdot N$                       |
| $N_{\text{ext}}$ : number of external neurons                   | 800                                 |
| $p$ : number of selective populations                           | 10                                  |
| $f$ : fraction of excitatory cells in each selective population | 0.1                                 |
| $\omega_+$ : relative strength of single potentiated synapses   | 2.3                                 |
| $\omega_-$ : relative strength of single depressed synapses     | $1 - \frac{f(\omega_+ - 1)}{1 - f}$ |
| $\omega_I$ : relative strength of inhibitory synapses           | 0.97                                |
| $\nu_{\text{ext}}$ : spike rate at external synapse             | 2.4 kHz                             |
| <b>Neuronal parameters (excitatory and inhibitory)</b>          |                                     |
| $V_L$ : resting membrane potential                              | -70 mV                              |
| $\theta$ : firing threshold                                     | -50 mV                              |
| $H$ : reset potential                                           | -55 mV                              |
| <b>Neuronal parameters (excitatory)</b>                         |                                     |
| $C_m$ : membrane capacitance                                    | 0.5 nF                              |
| $g_L$ : membrane leak conductance                               | 25 nS                               |
| $V_E$ : reversal potential                                      | 0 mV                                |
| $\tau_{\text{rp}}$ : refractory period                          | 2 ms                                |
| <b>Neuronal parameters (inhibitory)</b>                         |                                     |
| $C_m$ : membrane capacitance                                    | 0.2 pF                              |
| $g_L$ : membrane leak conductance                               | 20 nS                               |
| $V_I$ : reversal potential                                      | -70 mV                              |
| $\tau_{\text{rp}}$ : refractory period                          | 1 ms                                |
| <b>Synaptic parameters (excitatory and inhibitory)</b>          |                                     |
| $l$ : synaptic latency                                          | 0.5 ms                              |
| $[\text{Mg}^{2+}]$ : extracellular magnesium                    | 1 mM                                |
| $\tau_{\text{AMPA}}$ : decay time of AMPA currents              | 2 ms                                |
| $\tau_{\text{GABA}}$ : decay time of GABA currents              | 10 ms                               |
| $\tau_{\text{NMDA, rise}}$ : rise time of NMDA currents         | 2 ms                                |
| $\tau_{\text{NMDA, decay}}$ : decay time of NMDA currents       | 100 ms                              |
| $\alpha$ : normalisation factor for NMDA PSCS                   | $0.5 \text{ ms}^{-1}$               |
| $\beta$ : gain factor in magnesium block                        | $0.062 \text{ mV}^{-1}$             |
| $\gamma$ : modulatory factor of magnesium block                 | 3.57 mM                             |
| <b>Synaptic parameters (excitatory)</b>                         |                                     |
| $g_{\text{AMPA, ext}}$ : external AMPA synaptic conductance     | 2.08 nS                             |
| $g_{\text{AMPA, rec}}$ : recurrent AMPA synaptic conductance    | 104 nS/ $N$                         |
| $g_{\text{NMDA}}$ : recurrent NMDA synaptic conductance         | 327 nS/ $N$                         |
| $g_{\text{GABA}}$ : recurrent GABA synaptic conductance         | 1250 nS/ $N$                        |
| <b>Synaptic parameters (inhibitory)</b>                         |                                     |
| $g_{\text{AMPA, ext}}$ : external AMPA synaptic conductance     | 1.62 nS                             |
| $g_{\text{AMPA, rec}}$ : recurrent AMPA synaptic conductance    | 81 nS/ $N$                          |
| $g_{\text{NMDA}}$ : recurrent NMDA synaptic conductance         | 258 nS/ $N$                         |
| $g_{\text{GABA}}$ : recurrent GABA synaptic conductance         | 973 nS/ $N$                         |

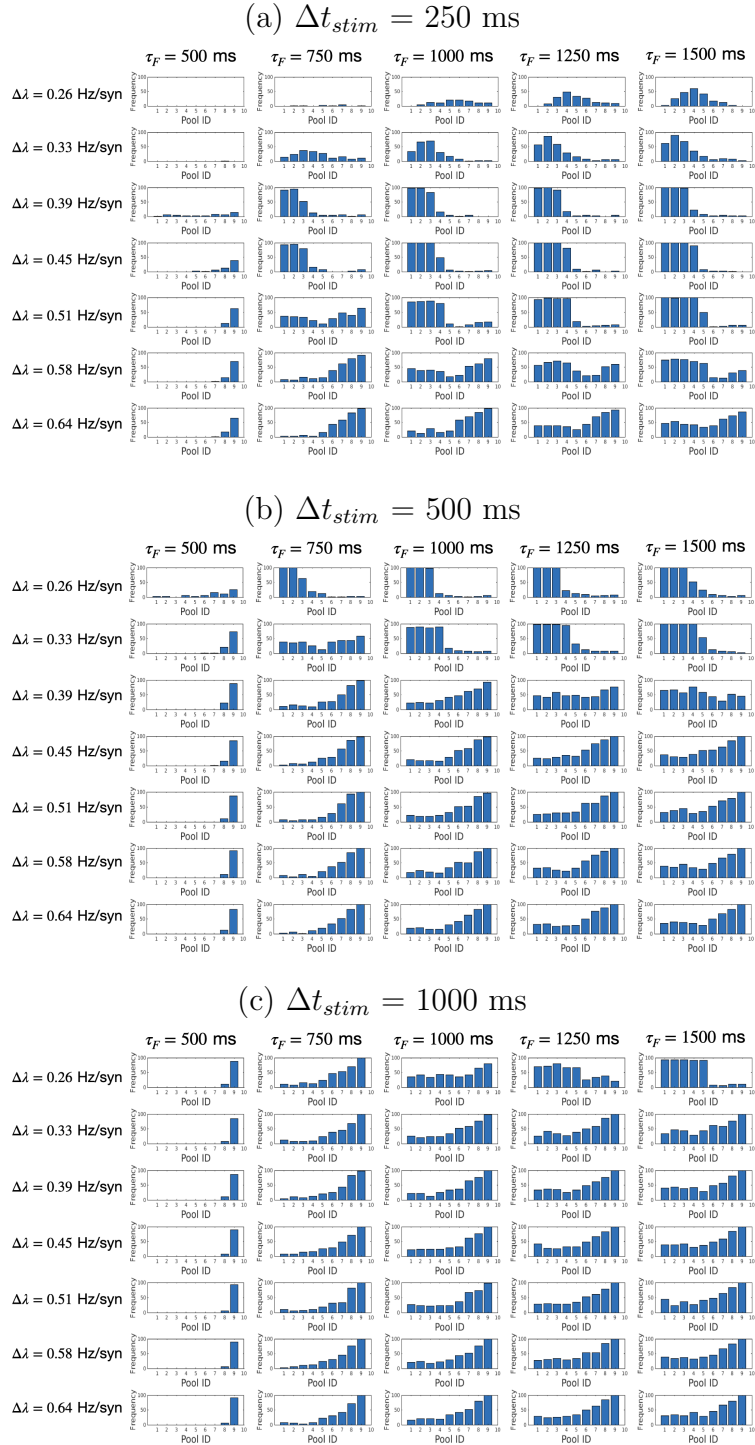

Figure S1: **Serial-order effects:** Analysis of the serial-order effects as a function of the concerted action of  $\tau_F$ ,  $\Delta\lambda$  ( $\Delta\lambda = \lambda_{stim} - \lambda_{ext}$ ), and  $\Delta t_{stim}$ . In all the simulations ( $N = 100$ ),  $\lambda_{ext} = 3.1$  Hz/synapse. Each bar indicates the frequency with which an item in a particular position in the sequential memory set (as characterised by its pool ID) is held in WM. (a)  $\Delta t_{stim} = 250$  ms, (b)  $\Delta t_{stim} = 500$  ms, and (c)  $\Delta t_{stim} = 1000$  ms.

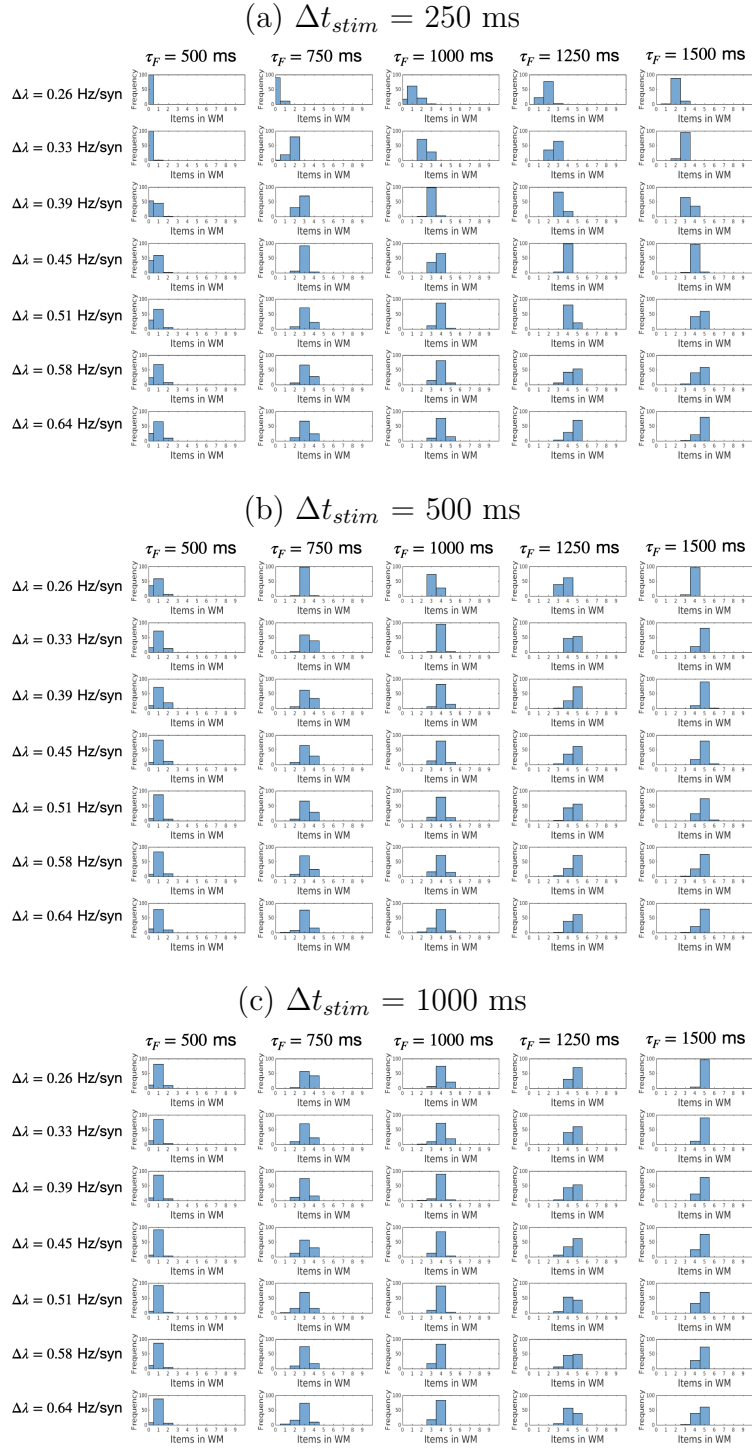

Figure S2: **WM capacity ( $K_e$ ):** Analysis of  $K_e$  as a function of the concerted action of  $\tau_F$ ,  $\Delta\lambda$  ( $\Delta\lambda = \lambda_{stim} - \lambda_{ext}$ ), and  $\Delta t_{stim}$ . In all the simulations ( $N = 100$ ),  $\lambda_{ext} = 3.1$  Hz/synapse. Each bar indicates the frequency with which a particular WM capacity ( $K_e$ ) emerges in the simulations. (a)  $\Delta t_{stim} = 250$  ms, (b)  $\Delta t_{stim} = 500$  ms, and (c)  $\Delta t_{stim} = 1000$  ms.
